# Supplementary material for: Green approach for the synthesis of a acrylonitrile hyperbranched polymer/chitosan composite for the removal of diclofenac from water: determination of optimal conditions using statistical experiment design
Source: Royal Society of Chemistry journal article supplement (doi:10.1039/d4nj04068f), 2024-01-01
Supplement: d4nj04068f1.pdf [file d4nj04068f1.pdf]

## Supporting Information

### **Green approach for the synthesis of acrylonitrile hyperbranched polymer/chitosan for the uptake of diclofenac from water: Determination of the optimal conditions by the statistical design of experiment.**

Atif Afroz <sup>a</sup>, Mohd Nasir <sup>a</sup>, Mohammad Kashif <sup>a\*</sup> and Mohammad Shahzad Samdani <sup>b</sup>

<sup>a</sup> Analytical Chemistry Section, Department of Chemistry, Aligarh Muslim University, Aligarh-202002 (U.P.), India.

<sup>b</sup> College of Science, King Saud University, Riyadh, Saudi Arabia

\* [mkashif25@gmail.com](mailto:mkashif25@gmail.com)

#### **Text**

**S1: Characterization of Material.** Throughout the extensive experimental investigations, we employed a series of analytical techniques to characterize the material. The pH meter (Cyberscan pH 2100) was used to monitor the solution pH, while UV-VIS spectrophotometer (UV-1800, Shimadzu, Japan) utilized to measure the amount of diclofenac in the solution. Perkin Elmer Spectrum 2 FT-IR spectrometer (4000-400  $\text{cm}^{-1}$ ) were used to acquire the Fourier transform infrared (FT-IR) spectra. SEM integrated with EDX (JEOL JSM-6510LV, Japan) were utilized to thoroughly examine the morphological change and elemental composition of material. Additionally, the surface area and porosity characteristics of material determined by using a surface pore analyzer (Micromeritics ASAP 2020 BET) with  $\text{N}_2$  gas adsorption/desorption at 77 K. The crystallinity of material was judged by PXRD utilizing high-performance X-ray powder diffractometer (Bruker AXS D8 Advance, Germany) equipped with  $\text{Cu K}\alpha$  radiation ( $\lambda = 0.154$  Å). The elemental composition and chemical state were evaluated by X-ray photoelectron

spectroscopy (XPS) analysis utilizing Thermo Scientific K-Alpha XPS system. Thermal properties of material were examined by TGA-DTA by using DTG 60H thermal analyzer (Shimadzu, Japan). The particle size distribution of the Ac-Hyp/Cs was investigated by Dynamic Light Scattering (DLS) technique utilizing Horiba SZ-100 equipment.

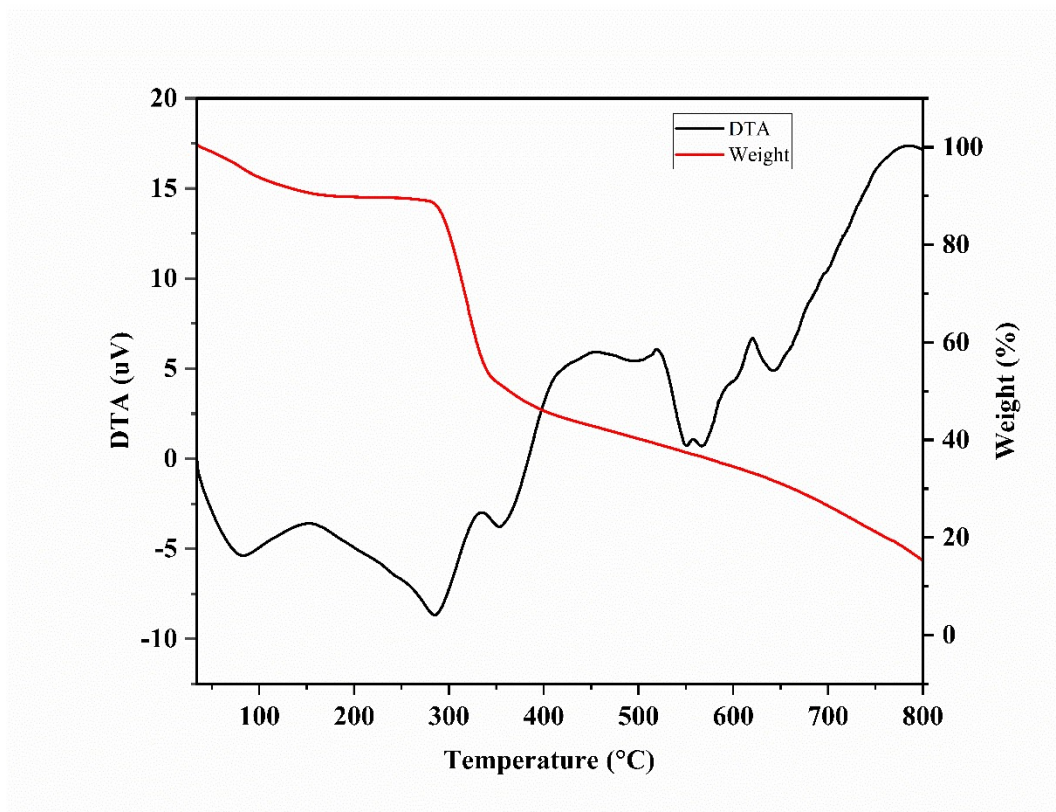

**Figure S1.** TGA and DTA curves of AC-Hyp/CS composite.

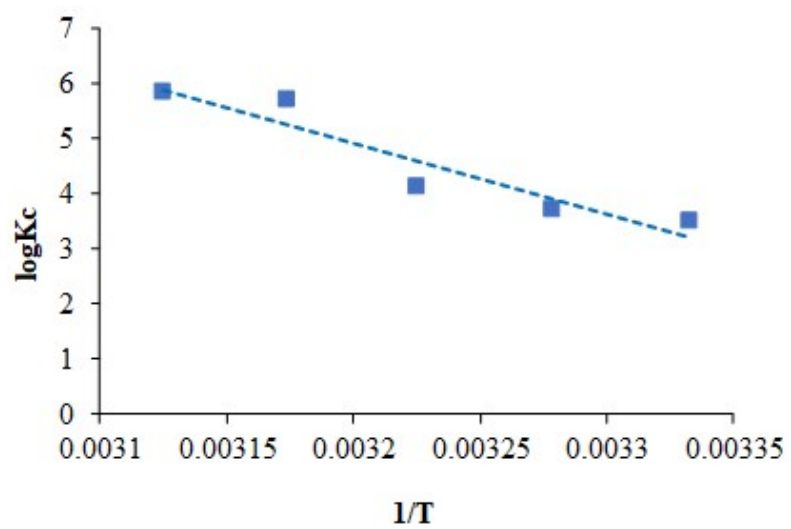

**Figure S2.** Von't Hoff plot for adsorption of diclofenac onto AC-Hyp/CS.
